# Supplementary material
Source: PubMed Central journal article supplement (PMC3891905)
Supplement: NIHMS540248-supplement-1.pdf [file NIHMS540248-supplement-1.pdf]

## Supporting Information

# Conjugation of antibodies to gold nanorods through Fc portion: synthesis and molecular specific imaging

Pratixa P. Joshi<sup>†</sup>, Soon Joon Yoon<sup>†</sup>, William G. Hardin<sup>‡</sup>, Stanislav Emelianov<sup>†,‡</sup>, Konstantin V. Sokolov<sup>†,‡,\*</sup>

<sup>†</sup>Department of Biomedical Engineering, University of Texas at Austin, Austin, Texas 78712

<sup>‡</sup>Texas Materials Institute, University of Texas at Austin, Austin, Texas 78712

<sup>‡</sup>Department of Imaging Physics, M.D. Anderson Cancer Center, Houston, Texas 77030.

\* Address correspondence to [kostia@mail.utexas.edu](mailto:kostia@mail.utexas.edu)

A)

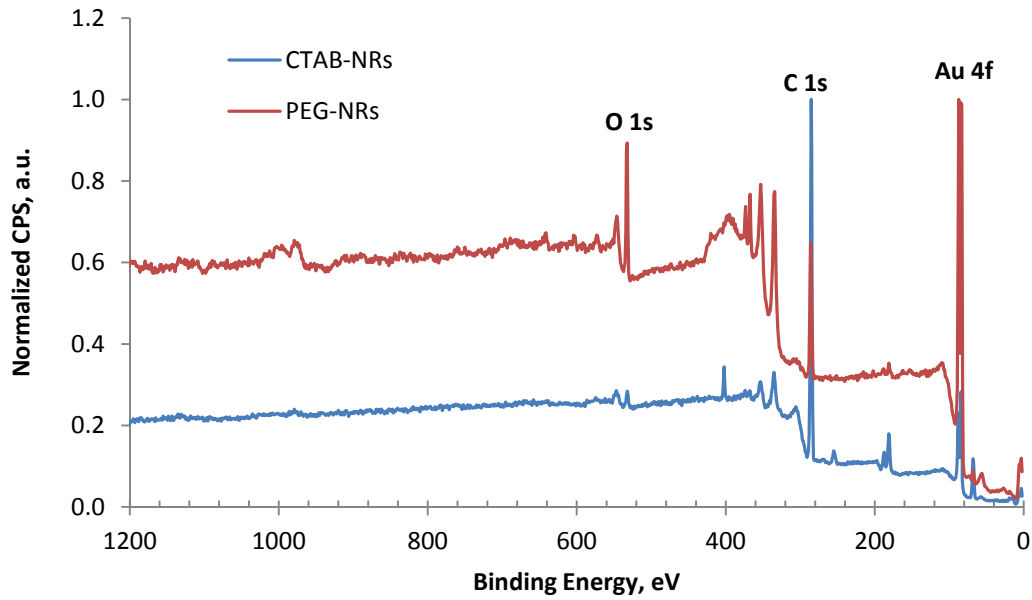

B)

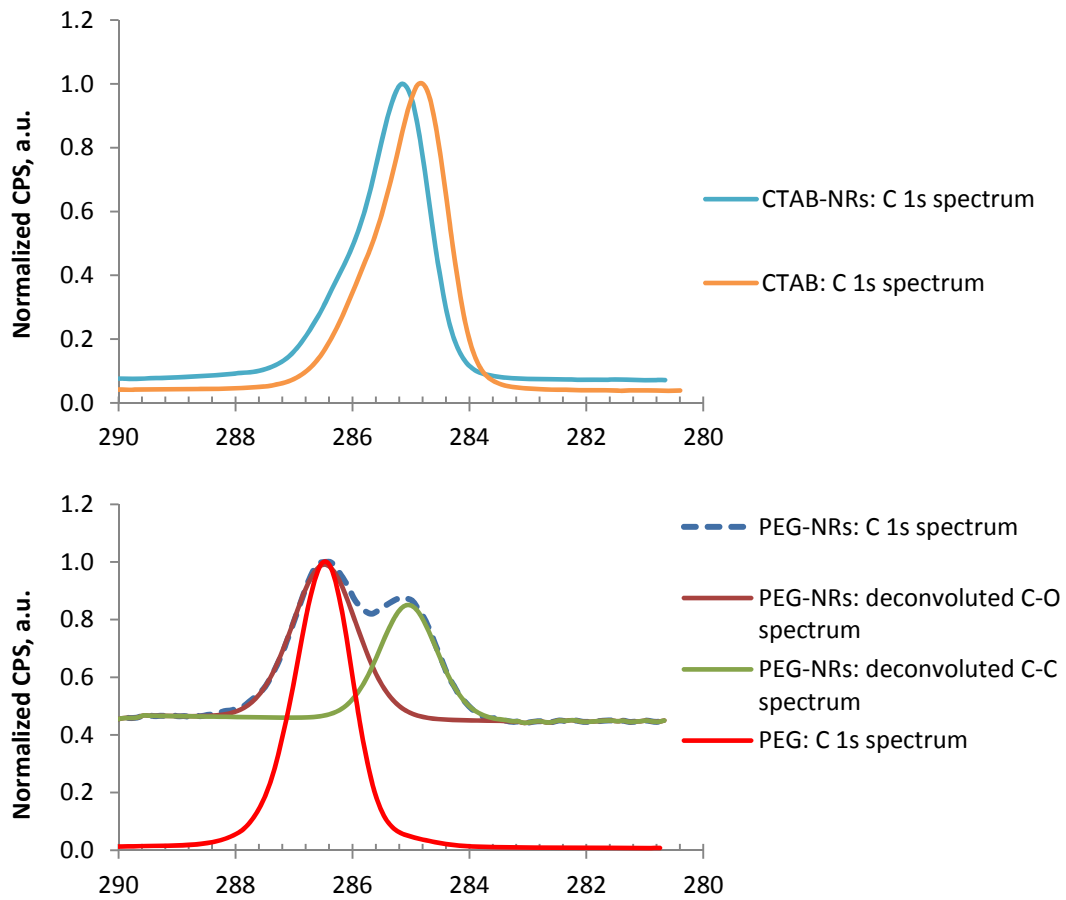

C)

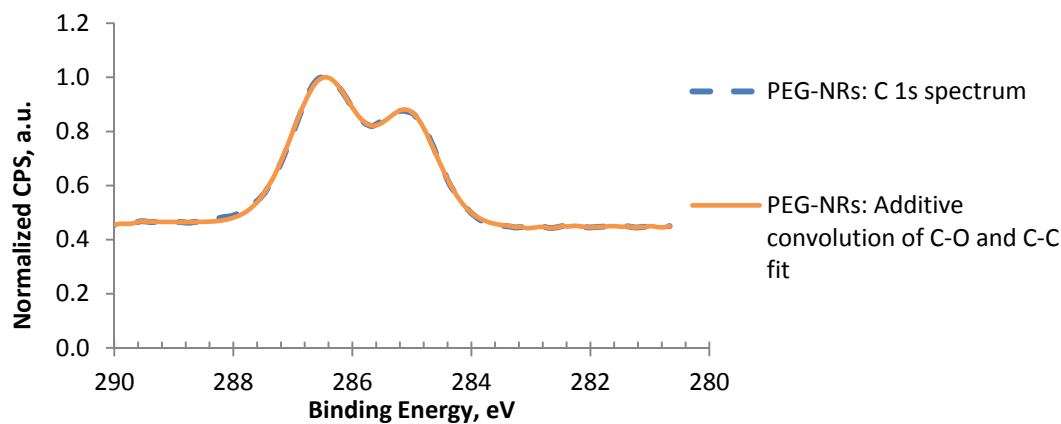

Figure S1: A) Survey scans of CTAB-NRs and PEG-NRs from XPS measurements; B) C 1s core spectra for CTAB, CTAB-NRs, PEG-SH and PEG-NRs. The PEG-NR spectrum shows contributions of C-O and C-C bonds. Electronic shift observed for CTAB-NRs as compared to pure CTAB is likely due to interactions between Au and CTAB whereby gold is more electron-withdrawing. Such shifts are characteristic of oxidation, indicating that the CTAB ligand on the nanorods is partially oxidized. C) Overlay of C 1s spectrum for PEG-NRs and additive convolution of C-O and C-C spectrum to show degree of agreement between the XPS collected spectra and the deconvolution.

## Determination of CTAB/PEG ratio and CTAB surface coating by XPS

The CTAB to PEG ratio on the surface of PEG-coated gold nanorods was determined from the integration of the N 1s and O 1s peaks in the XPS spectrum. CTAB molecule contains one N and no O atoms, while 2 KDa mPEG-SH has no N and 46 O atoms. As a result we have the following relationship between molar fractions of N ( $y_N$ ), O ( $y_O$ ), CTAB ( $y_{CTAB}$ ) and PEG ( $y_{PEG}$ ) on the PEG-coated nanorods.

$$y_N = y_{CTAB} \quad (I)$$

$$y_O = 46 * y_{PEG} \quad (II)$$

Integration of the N 1s and O 1s peaks in XPS spectrum of PEG-nanorods yields N/O ratio ( $y_N/y_O$ ) of 0.105. Using this ratio and the above relationships we determined that the molar ratio of CTAB to PEG ( $y_{CTAB}/y_{PEG}$ ) on the surface of PEG-coated nanorods is 4.8. Then, the following equation was used to find the number of surface ligands:

$$N_{CTAB} * f_{CTAB} + N_{PEG} * f_{PEG} = A * 0.9 \quad (III)$$

where,  $N_{CTAB}$  is the number of CTAB molecules on the nanorod surface divided by 2 because CTAB molecules are present on the surface as a bilayer;  $N_{PEG}$  is the number of PEG molecules on the nanorod surface;  $f_{CTAB}$  and  $f_{PEG}$  are footprints of CTAB and PEG molecules, respectively; and A is the surface area of a nanorod. Recent report showed that the footprint of CTAB on gold nanorods ( $f_{CTAB}$ ) is *ca.* 0.27 nm<sup>2</sup>.(1) It was shown that mPEG molecules can have a high density packing with  $f_{PEG} = 12$  nm<sup>2</sup> and a low density packing with  $f_{PEG} = 38$  nm<sup>2</sup>.(2) The factor of 0.9 arises from the approximation of ligand attachment as close-packed circles on a planar surface.(3) Considering the 15nmx40nm gold nanorods used in this study, the calculated amount of residual CTAB on gold nanorods after replacement with PEG is 2.3% for low density PEG and 7.1% for high density PEG; the CTAB coverage on initial CTAB nanorods is considered to be 100%.

A431 cells with NR-FL225

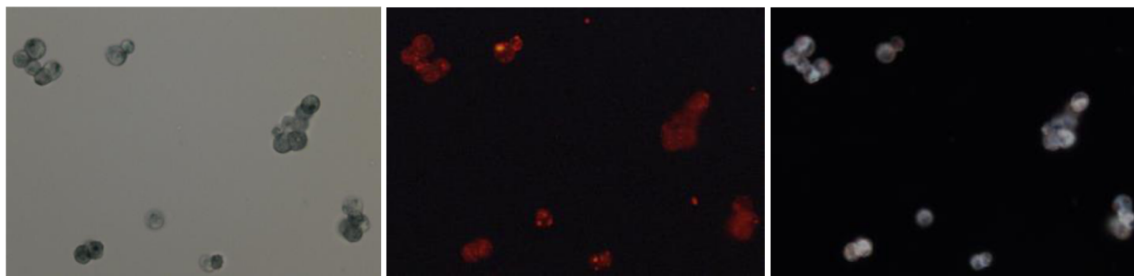

MDA-MB-435 cells with NR-FL225

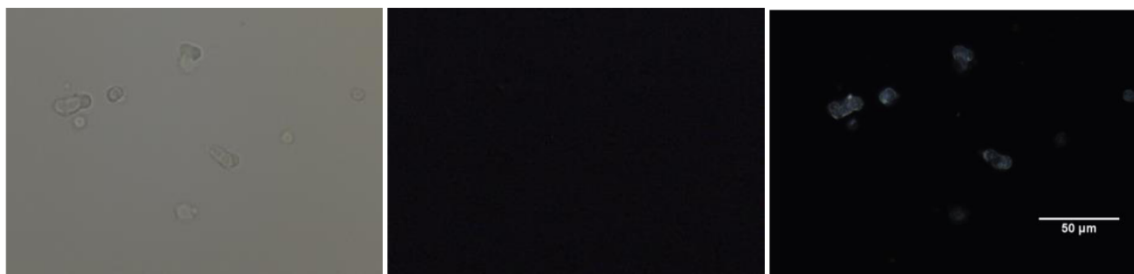

Figure S2: Right – Bright field images; middle – fluorescent images; left – dark-field images of A431 EGFR(+) (top row) and MDA-MB-435 EGFR(-) (bottom row) cells labeled using nanorods conjugated with fluorescently-labeled clone 225 (anti-EGFR) antibody. Scale bar = 50  $\mu\text{m}$ .

## References

- (1) Vigderman, L., Manna, P., and Zubarev, E. R. (2012) Quantitative Replacement of Cetyl Trimethylammonium Bromide by Cationic Thiol Ligands on the Surface of Gold Nanorods and Their Extremely Large Uptake by Cancer Cells. *Angewandte Chemie Int. Ed.* 51, 636-641.
- (2) Perry, J. L., Reuter, K. G., Kai, M. P., Herlihy, K. P., Jones, S. W., Luft, J. C., Napier, M., Bear, J. E., and DeSimone, J. M. (2012) PEGylated PRINT Nanoparticles: The Impact of PEG Density on Protein Binding, Macrophage Association, Biodistribution, and Pharmacokinetics. *Nano Letters* 12, 5304-5310.
- (3) Bezdek, K. (1986) Circle Packings into Convex Domains of the Euclidean and Hyperbolic Plane and the Sphere. *Geometriae Dedicata* 21, 249-255.
